# Supplementary material for: Metformin Resistance Is Associated with Expression of Inflammatory and Invasive Genes in A549 Lung Cancer Cells
Source: MDPI journal article supplement (doi:10.3390/genes14051014), 2023-04-29
Supplement: s1 [file s1]

**Table S3. The SYBR green primers for qRT-PCR**

|                                    | <i>Gene</i>                    | Forward sequence         | Reverse sequence        |
|------------------------------------|--------------------------------|--------------------------|-------------------------|
| KEEG Cytokine-cytokine interaction | <i>TNFRSF19</i>                | GGTGCATTCTGCAGCCAGTCTT   | CAGGCATCTGAAAACTCGCCAC  |
|                                    | <i>IL6</i>                     | AGACAGCCACTCACCTCTTCAG   | TTCTGCCAGTGCCCTTTTGCTG  |
|                                    | <i>BMP5</i>                    | CTCTCATCAGGACTCCTCCAGA   | GGAAGCTCACATAGAGTTCGTGC |
|                                    | <i>CXCL1</i>                   | AGCTTGCCTCAATCCTGCATCC   | TCCTTCAGGAACAGCCACCAGT  |
|                                    | <i>CXCL3</i>                   | TTCACCTCAAGAACATCCAAAGTG | TTCTTCCCATTCTTGAGTGTGGC |
|                                    | <i>CXCL8</i>                   | GAGAGTGATTGAGAGTGGACCAC  | CACAACCCTCTGCACCCAGTTT  |
|                                    | <i>CCL2</i>                    | AGAATCACCAGCAGCAAGTGTC   | TCCTGAACCCACTTCTGCTTGG  |
|                                    | <i>CXCL2</i>                   | GGCAGAAAGCTTGTCTCAACCC   | CTCCTTCAGGAACAGCCACCAA  |
|                                    | <i>CXCL5</i>                   | CAGACCACGCAAGGAGTTCATC   | TTCCTTCCCGTTCTTCAGGGAG  |
|                                    | <i>BMP7</i>                    | GAGGTGTCCTTCCCTCTGAACT   | AGGACGGAGATGGCATTGAGCT  |
|                                    | <i>CD70</i>                    | TTCGCACAGGCTCAGCAGCAG    | TTGTCCAGCTCTGGTCCATGCA  |
|                                    | <i>CCL26</i>                   | GGGAGTGACATATCCAAGACCTG  | CAGACTTTCTTGCCCTTTTGGTA |
| GO Cell adhesion                   | <i>COL15A1</i>                 | GGTGACACTGGTTTACCTGGCT   | GCCTTTCAGAGGAATGTCCTC   |
|                                    | <i>LAMA4</i>                   | GAGATGACTCTCTGCTGGACCT   | AGTTCAGGCAGCCAACAAAGC   |
|                                    | <i>TNC</i>                     | ATGTCCTCCTGACAGCCGAGAA   | AGTCACGGTGAGGTTTTCCAGC  |
|                                    | <i>EPHA4</i>                   | ACCAAGCAGTGCGAGAGTTTGC   | CTCTCTTGCCAGGCACTTTGAG  |
|                                    | <i>ADAM12</i>                  | ATGGCATCTGCCAGACTCACGA   | GGAACCTTCGAGACTTTGCCAC  |
|                                    | <i>ITGA4</i>                   | GCATACAGGTGTCCAGCAGAGA   | AGGACCAAGGTGGTAAGCAGCT  |
|                                    | <i>VCAM1</i>                   | GATTCTGTGCCCACAGTAAGGC   | TGGTCACAGAGCCACCTTCTTG  |
|                                    | <i>PCDH10</i>                  | TCTCCAACGGAAGCATTTTGTCC  | CTATGTCGGCTTCTGGAATGC   |
|                                    | <i>NID2</i>                    | GAGCTGTACCACTACTCCGACT   | TGTTCTGGTGGATGCGGTAGGA  |
|                                    | <i>POSTN</i>                   | CAGCAAACCACCTTCACGGATC   | TTAAGGAGGCGCTGAACCATGC  |
|                                    | <i>ADGRE1</i>                  | TGTGACGTTGGACTTGGTAGCC   | GGAGACAAAAGCCACACCAGTG  |
|                                    | <i>ICAM1</i>                   | AGCGGCTGACGTGTGCAGTAAT   | TCTGAGACCTCTGGCTTCGTCA  |
|                                    | <i>MCAM</i>                    | ATCGCTGCTGAGTGAACCACAG   | CTACTCTCTGCCTCACAGGTCA  |
|                                    | <i>KITLG</i>                   | CTGGAGACTCCAGCCTACACTG   | CTGCCCTTGTAAAGACTTGGCTG |
|                                    | <i>LGALS3BP</i>                | GGCAGCAATGTCACCATGAGTG   | GTGGAAGCACTTGACTGACGAC  |
| Migration / Invasion               | <i>N-Cadherin</i>              | CCTCCAGAGTTTACTGCCATGAC  | GTAGGATCTCCGCCACTGATTC  |
|                                    | <i>MMP2</i>                    | AGCGAGTGGATGCCGCTTTAA    | CATTCCAGGCATCTGCGATGAG  |
|                                    | <i>MMP9</i>                    | GCCACTACTGTGCCTTTGAGTC   | CCCTCAGAGAATCGCCAGTACT  |
|                                    | <i><math>\alpha</math>-SMA</i> | CTATGCCTCTGGACGCACAAC    | CAGATCCAGACGCATGATGGCA  |
|                                    | <i>Vimentin</i>                | AGGCAAAGCAGGAGTCCACTGA   | ATCTGGCGTTCCAGGGACTCAT  |
|                                    | <i>Slug</i>                    | ATCTGCGGCAAGGCGTTTTCCA   | GAGCCCTCAGATTTGACCTGTC  |
| Cell cycle                         | <i>p21</i>                     | AGGTGGACCTGGAGACTCTCAG   | TCCTCTTGAGAAGATCAGCCG   |
|                                    | <i>CDK2</i>                    | ATGGATGCCTCTGCTCTCACTG   | CCCGATGAGAATGGCAGAAAGC  |

|              |                               |                         |                         |
|--------------|-------------------------------|-------------------------|-------------------------|
|              | <i>CDC25A</i>                 | TCTGGACAGCTCCTCTCGTCAT  | ACTTCCAGGTGGAGACTCCTCT  |
|              | <i>Cyclin D1</i>              | TCTACACCGACAACCTCCATCCG | TCTGGCATTCTGGAGAGGAAGTG |
|              | <i>CDK4</i>                   | CCATCAGCACAGTTCGTGAGGT  | TCAGTTCGGGATGTGGCACAGA  |
|              | <i>CDC14A</i>                 | TAGATGGCAGCACACCCAGTGA  | GTCCCTGTTCTTCCAAGACCAG  |
|              | <i>CDK6</i>                   | GGATAAAGTTCCAGAGCCTGGAG | GCGATGCACTACTCGGTGTGAA  |
|              | <i>Cyclin E1</i>              | TGTGTCCTGGATGTTGACTGCC  | CTCTATGTCGCACCACTGATACC |
| Inflammation | <i>TNF<math>\alpha</math></i> | CTCTTCTGCCTGCTGCACTTTG  | ATGGGCTACAGGCTTGCTACTC  |
|              | <i>IL-1<math>\beta</math></i> | CCACAGACCTTCCAGGAGAATG  | GTGCAGTTCAGTGATCGTACAGG |
|              | <i>COX2</i>                   | CGGTGAAACTCTGGCTAGACAG  | GCAAACCGTAGATGCTCAGGGA  |
