# Supplementary material for: Metformin Resistance Is Associated with Expression of Inflammatory and Invasive Genes in A549 Lung Cancer Cells
Source: MDPI journal article supplement (doi:10.3390/genes14051014), 2023-04-29
Supplement: s1 [file s1]

**Table S1. Antibodies**

| <b>Antibodies</b>     | <b>SOURCE</b>             | <b>IDENTIFIER</b> |
|-----------------------|---------------------------|-------------------|
| Anti-H3               | Cell Signaling Technology | 4499              |
| Anti-H3K4me1          | Cell signaling Technology | 5326              |
| Anti-H3K9me2          | Cell signaling Technology | 4658              |
| Anti-H3K9me3          | Cell signaling Technology | 13969             |
| Anti-H3K27me2         | Cell signaling Technology | 9728              |
| Anti-H3K27me3         | Cell signaling Technology | 9733              |
| Anti-H3K27ac          | Cell signaling Technology | 8179              |
| Anti-H3K36me2         | Cell signaling Technology | 2901              |
| Anti-H3K36me3         | Cell signaling Technology | 4909              |
| Anti-p38 MAPK         | Cell signaling Technology | 9212              |
| Anti-phospho-mTOR     | Cell signaling Technology | 5536              |
| Anti-mTOR             | Cell signaling Technology | 2983              |
| Anti- $\beta$ -actin  | BioLegend                 | 622102            |
| Anti-phospho-STAT3    | BioLegend                 | 651001            |
| Anti-STAT3            | BioLegend                 | 678002            |
| Anti-STAT5            | BioLegend                 | 660202            |
| Anti-phospho-NFkB p65 | Abcam                     | ab76302           |
| Anti-phospho-STAT5    | Santa Cruz Biotechnology  | sc-101806         |
| Anti-NFkB p65         | Santa Cruz Biotechnology  | sc-372            |
| Anti-phospho-p38 MAPK | BD Biosciences            | 612280            |
| Anti-MMP-2            | Abcam                     | ab6003            |
| Anti-vimentin         | Santa Cruz Biotechnology  | sc-6260           |
| Anti-p21              | Santa Cruz Biotechnology  | sc-397            |
| Anti-VCAM-1           | Santa Cruz Biotechnology  | sc-8304           |
| Anti-E-cadherin       | BD Biosciences            | 610182            |
| Anti-cyclin E1        | Santa Cruz Biotechnology  | sc-25303          |
| Anti-Rabbit<br>HRP    | GeneTex                   | GTX213110-01      |
| Anti-Mouse<br>HRP     | GeneTex                   | GTX213110-11      |
| Anti-Vinculin         | Santa Cruz Biotechnology  | sc-5573           |
| Anti-Rabbit FSD™ 488  | BioActs                   | RSA1245           |
| Anti-Cdk4             | Santa Cruz Biotechnology  | sc-23896          |
| Anti-Cdk5             | Santa Cruz Biotechnology  | sc-249            |
| Anti-ICAM             | Santa Cruz Biotechnology  | sc-8439           |
